# Supplementary material for: Neurologisches Ergebnis und allgemeiner Gesundheitszustand bei Langzeitüberleben nach außerklinischer kardiopulmonaler Reanimation
Source: Springer Nature journal article supplement (doi:10.1007/s10049-021-00929-2), 2021-08-24
Supplement: MOESM1 [file 19597008]

**Suppl. Tabelle 1**

| Frage                                                                                                                                                                                  | N  | Antworten, n (%)*            |                          |                          |                          |                     |                |
|----------------------------------------------------------------------------------------------------------------------------------------------------------------------------------------|----|------------------------------|--------------------------|--------------------------|--------------------------|---------------------|----------------|
| Wie würden Sie ihren allgemeinen Gesundheitszustand beschreiben?                                                                                                                       | 31 | Ausgezeichnet<br>4 (12,9)    | Sehr gut<br>6 (19,4)     | gut<br>13 (41,9)         | weniger gut<br>5 (16,1)  | schlecht<br>3 (9,7) |                |
| Sind sie durch ihren Gesundheitszustand bei mittel-schweren Tätigkeiten (wie Tisch verschieben, staub-saugen, kegeln, Golf spielen) eingeschränkt?                                     | 29 | Nein<br>12 (41,4)            | Ja, etwas<br>13 (44,8)   | Ja, stark<br>4 (13,8)    |                          |                     |                |
| Sind sie durch ihren Gesundheitszustand beim Treppensteigen über mehrere Absätze eingeschränkt?                                                                                        | 29 | Nein<br>8 (27,6)             | Ja, etwas<br>16 (55,2)   | Ja, stark<br>5 (17,2)    |                          |                     |                |
| Haben sie in der vergangenen Woche wegen ihrer körperlichen Gesundheit weniger geschafft, als sie wollten?                                                                             | 29 | Nein<br>20 (69)              | Ja<br>9 (31)             |                          |                          |                     |                |
| Haben sie in der vergangenen Woche wegen seelischer Probleme weniger geschafft, als sie wollten (sie fühlten sich z. B. niedergeschlagen oder ängstlich)?                              | 29 | Nein<br>21 (72,4)            | Ja<br>8 (27,6)           |                          |                          |                     |                |
| Konnten sie in der vergangenen Woche wegen seelischer Probleme nicht so sorgfältig wie üblich arbeiten (sie fühlten sich z. B. niedergeschlagen oder ängstlich)?                       | 28 | Nein<br>21 (75)              | Ja<br>7 (25)             |                          |                          |                     |                |
| Hatten sie in der vergangenen Woche Schwierigkeiten, sich zu konzentrieren?                                                                                                            | 18 | Nein<br>11 (61,1)            | Ja<br>7 (38,9)           |                          |                          |                     |                |
| Konnten sie sich in der vergangenen Woche Dinge nicht merken?                                                                                                                          | 18 | Nein<br>12 (66,7)            | Ja<br>6 (33,3)           |                          |                          |                     |                |
| Fühlten Sie sich in der vergangenen Woche durch Konzentrationsprobleme im Alltag eingeschränkt?                                                                                        | 18 | Nein<br>8 (44,4)             | Ja, etwas<br>9 (50)      | Ja, stark<br>1 (5,6)     |                          |                     |                |
| Inwieweit sind Sie in der vergangenen Woche durch Schmerzen an der Ausübung von Alltagstätigkeiten zu Hause oder im Beruf gehindert worden?                                            | 29 | Überhaupt nicht<br>12 (41,4) | Ein bisschen<br>5 (17,2) | Mäßig<br>5 (17,2)        | Ziemlich<br>5 (17,2)     | Sehr<br>(6,9)       |                |
| Wie oft waren sie in der vergangenen Woche ruhig und gelassen?                                                                                                                         | 29 | Immer<br>3 (10,3)            | Meistens<br>12 (41,4)    | Ziemlich oft<br>4 (13,8) | Manchmal<br>6 (20,7)     | Selten<br>4 (13,8)  | Nie<br>0 (0)   |
| Wie oft waren sie in der vergangenen Woche voller Energie?                                                                                                                             | 29 | Immer<br>3 (10,3)            | Meistens<br>6 (20,7)     | Ziemlich oft<br>8 (27,6) | Manchmal<br>6 (20,7)     | Selten<br>5 (17,2)  | Nie<br>1 (3,4) |
| Wie oft waren sie in der vergangenen Woche entmutigt und traurig?                                                                                                                      | 29 | Nie<br>9 (31)                | Selten<br>8 (27,6)       | Manchmal<br>5 (17,2)     | Ziemlich oft<br>5 (17,2) | Meistens<br>2 (6,9) | Immer<br>0 (0) |
| Wie oft haben Ihre körperliche Gesundheit oder seelischen Probleme Ihre Kontakte zu anderen Menschen (z. B. Besuche bei Freunden, Verwandten) in der vergangenen Woche beeinträchtigt? | 29 | Nie<br>14 (48,3)             | Selten<br>6 (20,7)       | Manchmal<br>6 (20,7)     | Ziemlich oft<br>3 (10,3) | Meistens<br>0 (0)   | Immer<br>0 (0) |
| Würden Sie - mit dem Wissen von heute - anderen Menschen empfehlen, im Falle eines Herz-Kreislaufstillstandes Reanimationsmaßnahmen zuzulassen?                                        | 18 | Ja<br>18 (100)               | Nein<br>0 (0)            |                          |                          |                     |                |

**Legende:** Ergebnis der Befragung zur Einschätzung des Gesundheitszustandes. N: Gültige Antworten. n: Anzahl. \*: % von N.
